# Supplementary material for: Solvent effects on triplet–triplet annihilation upconversion kinetics of perylene with a Bodipy-phenyl-C60photosensitizer
Source: Royal Society of Chemistry journal article supplement (doi:10.1039/d0cp04230g), 2020-01-01
Supplement: d0cp04230g1.pdf [file d0cp04230g1.pdf]

Supporting information

## **Solvent effects on triplet-triplet annihilation upconversion kinetics of perylene with Bodipy-phenyl-C<sub>60</sub> photosensitizer**

Yaxiong Wei,<sup>1,2</sup> Ye Wang,<sup>3,4</sup> Qiaohui Zhou,<sup>1</sup> Song Zhang,<sup>3,4,†</sup>

Bing Zhang,<sup>3,4</sup> Xiaoguo Zhou,<sup>1,†</sup> and Shilin Liu<sup>1</sup>

### **Contents**

1. Gibbs free-energy calculations
2. Femtosecond time-resolved transient absorption spectra.
3. Nanosecond time-resolved transient absorption spectra
4. Decay curves of B-2 with different concentration of perylene
5. UV-Vis and fluorescence emission spectra of perylene in different solvents
6. The fitted parameters of TTA upconversion
7. The reported heavy-atom-free photosensitizers applied in TTA upconversion

## 1. Gibbs free-energy calculations

Using the redox potentials and the optimized molecular geometries, the thermodynamic driving forces for charge-recombination ( $\Delta G_{CR}$ ) and charge-separation ( $\Delta G_{CS}$ ), as well as charge-separated state energy ( $E_{CSS}$ ), of Bodipy-phenyl- $C_{60}$  dyad were calculated with the Weller equations (S1)–(S3).

$$\Delta G_{CR} = - [E_{OX}(BDP^+/BDP) - E_{RED}(C_{60}/C_{60}^-)] - \Delta G_s \quad (S1)$$

$$\Delta G_{CS} = - \Delta G_{CR} - \Delta E_{00} \quad (S2)$$

$$E_{CSS} = [E_{OX}(BDP^+/BDP) - E_{RED}(C_{60}/C_{60}^-)] + \Delta G_s \quad (S3)$$

where  $E_{OX}(BDP^+/BDP)$  was the half-wave potential for one electron oxidation of the electron donor Bodipy unit,  $E_{RED}(C_{60}/C_{60}^-)$  was the half-wave potential for one-electron reduction of the electron acceptor  $C_{60}$  unit,  $\Delta E_{00}$  was the crossing point of the absorption and fluorescence spectra, *e.g.* 2.36 eV for Bodipy-phenyl- $C_{60}$ , and  $\Delta G_s$  was the static Coulombic energy which could be calculated with the dielectric continuum model as the equation (S4).

$$\Delta G_s = - \frac{e^2}{4\pi\epsilon_0\epsilon_s R_{CC}} - \frac{e^2}{8\pi\epsilon_0} \left( \frac{1}{R_D} + \frac{1}{R_A} \right) \left( \frac{1}{\epsilon_{REF}} - \frac{1}{\epsilon_s} \right) \quad (S4)$$

where  $e$  was the electronic charge,  $\epsilon_0$ ,  $\epsilon_s$  and  $\epsilon_{REF}$  represented the vacuum permittivity, the dielectric constants of solvent and reference, respectively. In present experiments, the solvents were dichloromethane ( $\epsilon_s = 9.1$ ) and toluene ( $\epsilon_{REF} = 2.24$ ).  $R_{CC}$  was the center-to-center distance between the electron donor and the electron acceptor, which was 13.1 Å in the Bodipy-phenyl- $C_{60}$  dyad suggested by DFT optimized geometry.  $R_D$  and  $R_A$  represented the radius of electron donor and electron acceptor, and they were estimated to be 6.1 Å and 3.6 Å in the dyad by using the maximum extension radius of the molecular electron cloud in space.

**Table S1** Electrochemical redox potentials of C<sub>60</sub>, B-1 and B-2<sup>a</sup>

|                         | E(ox) / V | E(red) / V                 |
|-------------------------|-----------|----------------------------|
| C <sub>60</sub>         | -         | -0.67, -1.07, -1.52        |
| Bodipy                  | 1.12      | -1.32                      |
| C <sub>60</sub> -Bodipy | 1.14      | -0.79, -1.18, -1.32, -1.71 |

<sup>a</sup> Cyclic voltammetry in Ar saturated DCM containing a 0.1 M Bu<sub>4</sub>NPF<sub>6</sub> as supporting electrolyte. Working electrode was glassy carbon electrode, the counter electrode was Pt electrode, and the reference electrode was Ag/AgNO<sub>3</sub> electrode. Scan rates: 0.05 V/s, 20°C. Ferrocene (Fc) was used as internal reference ( $E_{1/2} = +0.38$  V) vs saturated calomel electrode (SCE).

**Table S2** Dielectric constant ( $\epsilon$ ), static Coulombic energy ( $\Delta G_s$ ), thermodynamic driving forces for the charge-separation ( $\Delta G_{CS}$ ) and charge-separated state energy ( $E_{CCS}$ )

| Solvent         | $\epsilon$ | $\Delta G_s/J$          | $\Delta G_{CS}/eV$ | $E_{CCS}/eV$ |
|-----------------|------------|-------------------------|--------------------|--------------|
| 1,4-dioxane     | 2.21       | $+9.46 \times 10^{-20}$ | +0.18              | 2.52         |
| Toluene         | 2.24       | $+9.26 \times 10^{-20}$ | +0.17              | 2.51         |
| Chlorobenzene   | 5.65       | $+3.01 \times 10^{-21}$ | -0.39              | 1.95         |
| Dichlorobenzene | 6.83       | $-7.16 \times 10^{-21}$ | -0.45              | 1.93         |
| THF             | 7.58       | $-1.20 \times 10^{-20}$ | -0.49              | 1.89         |

## 2. Femtosecond time-resolved transient absorption spectra.

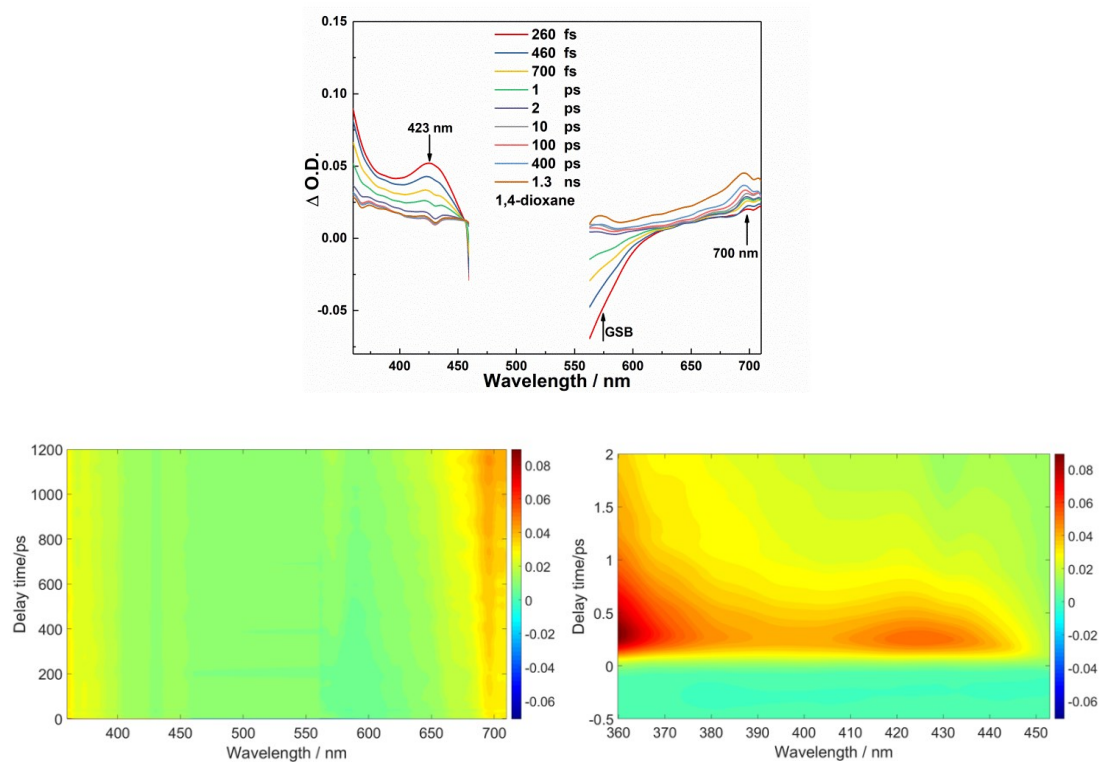

**Figure S1.** Femtosecond transient absorption spectra of B-2 in 1,4-dioxane, excited at 532 nm, 25°C.

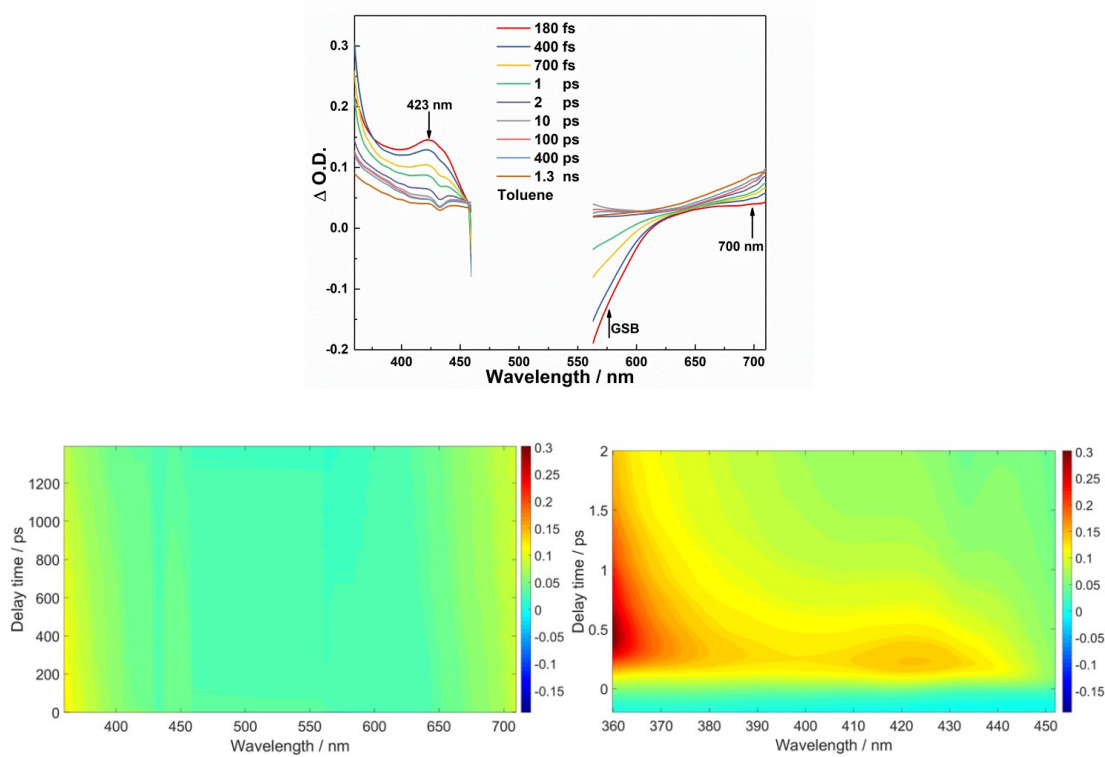

**Figure S2.** Femtosecond transient absorption spectra of B-2 in toluene, excited at 532 nm, 25°C.

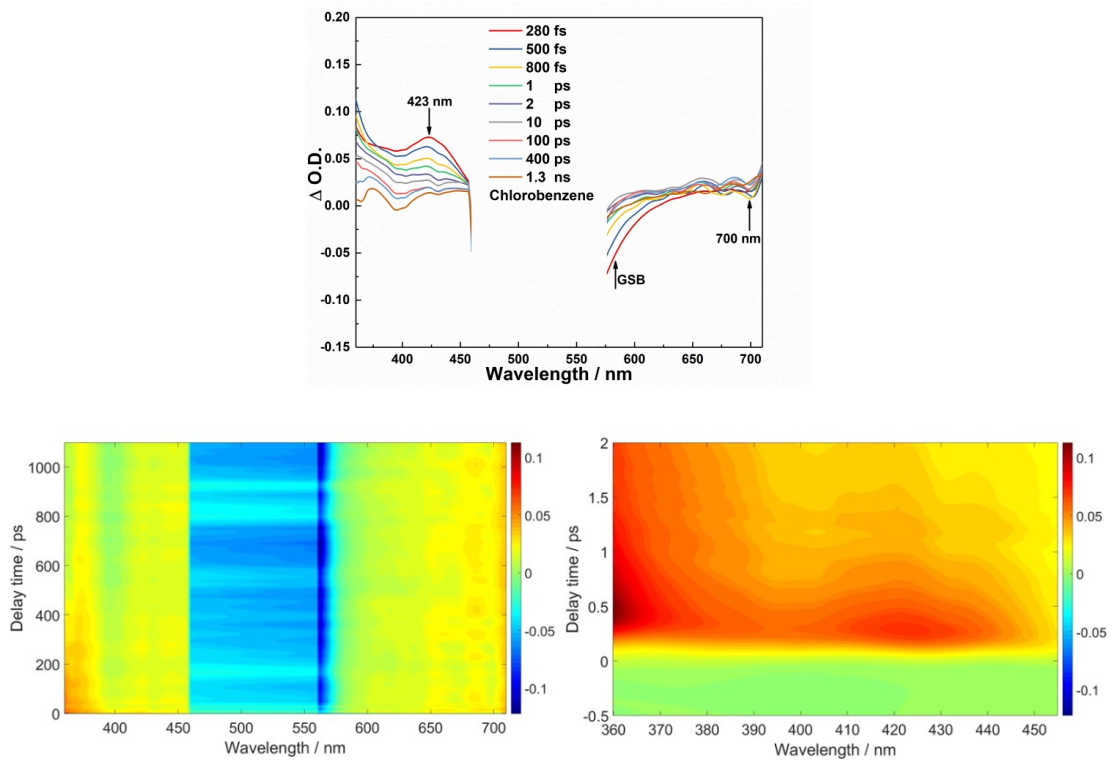

**Figure S3.** Femtosecond transient absorption spectra of B-2 in chlorobenzene, excited at 532 nm, 25°C.

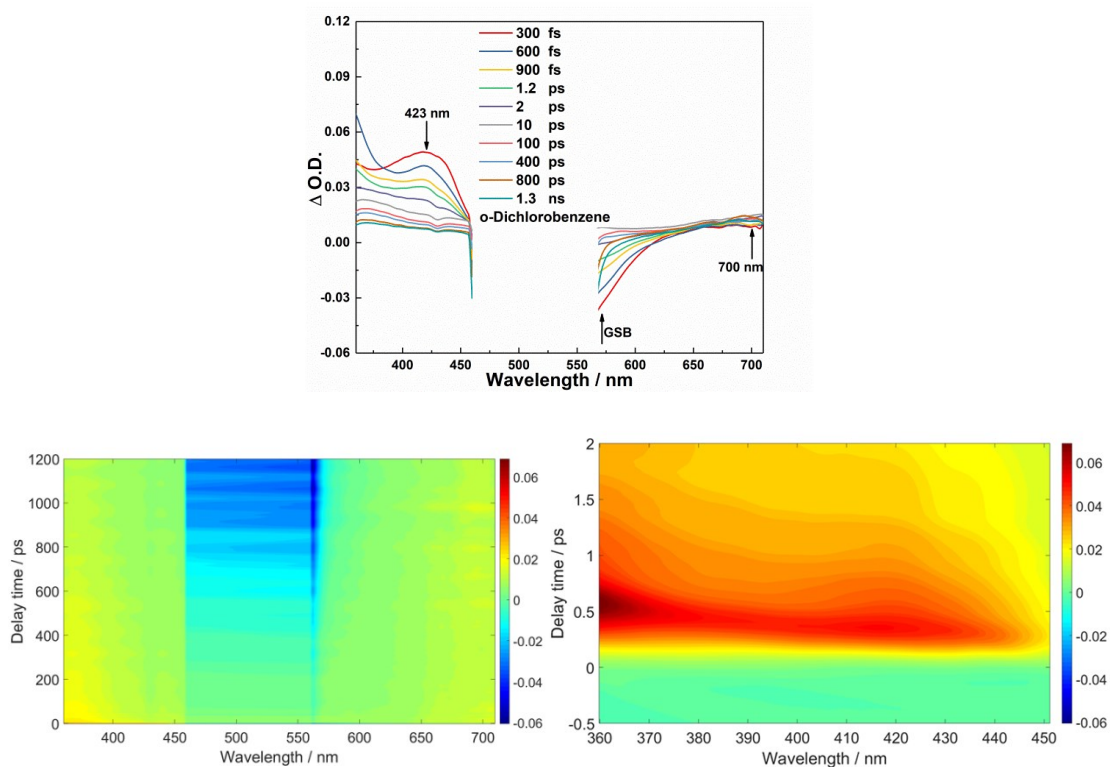

**Figure S4.** Femtosecond transient absorption spectra of B-2 in dichlorobenzene, excited at 532 nm, 25°C.

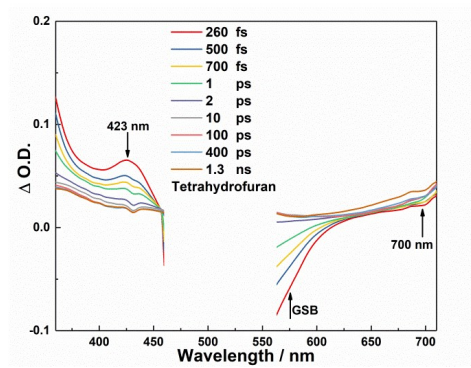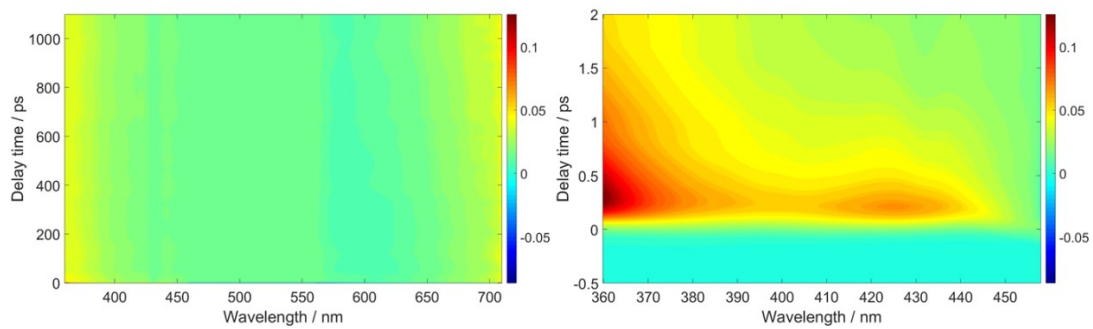

**Figure S5.** Femtosecond transient absorption spectra of B-2 in THF, excited at 532 nm, 25°C.

### 3. Nanosecond time-resolved transient absorption spectra

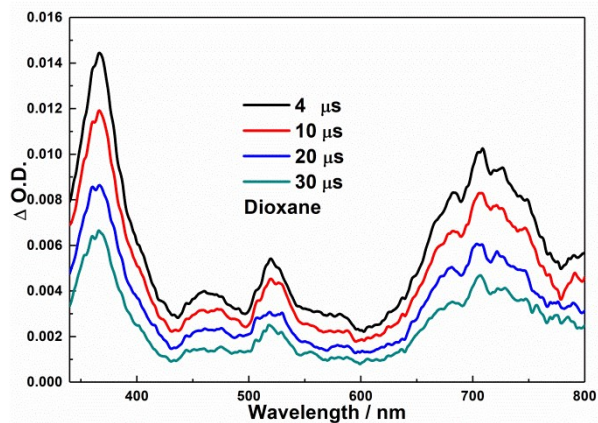

**Figure S6.** Nanosecond time-resolved transient absorption spectra of B-2 in deaerated 1,4-dioxane.

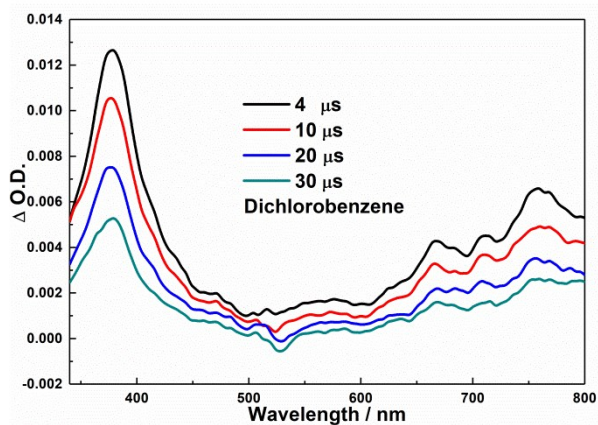

**Figure S7.** Nanosecond time-resolved transient absorption spectra of B-2 in deaerated dichlorobenzene.

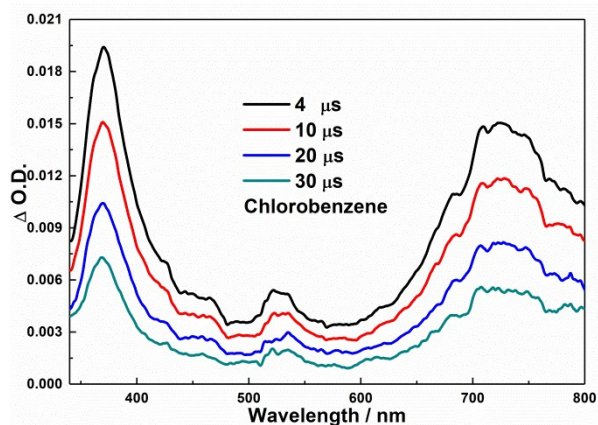

**Figure S8.** Nanosecond time-resolved transient absorption spectra of B-2 in deaerated chlorobenzene.

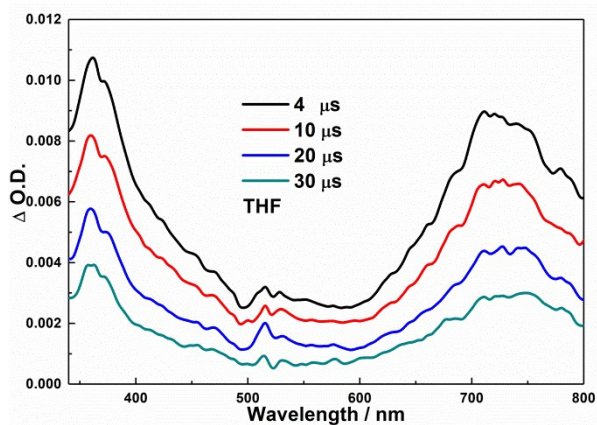

**Figure S9.** Nanosecond time-resolved transient absorption spectra of B-2 in deaerated THF.

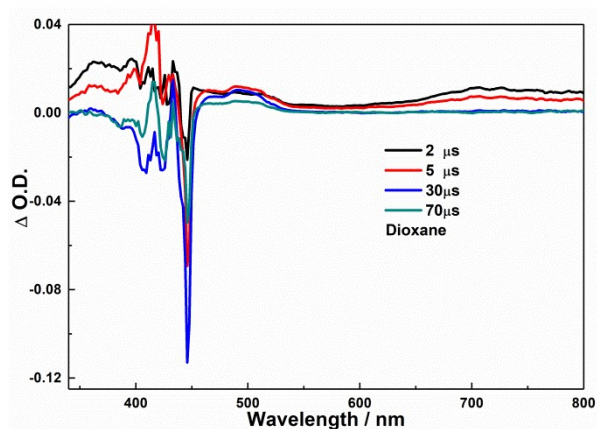

**Figure S10.** Nanosecond time-resolved transient absorption spectra of B-2 and perylene in deaerated 1,4-dioxane.

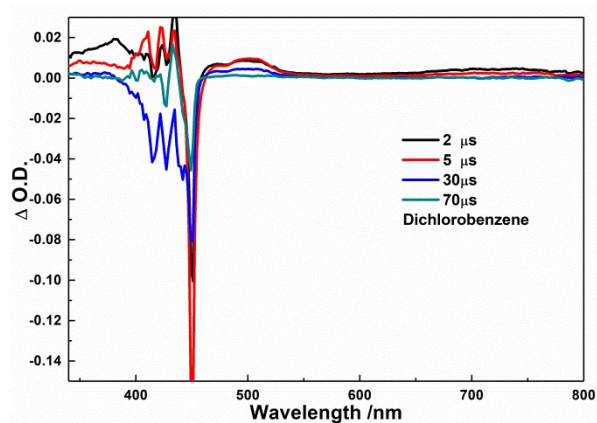

**Figure S11.** Nanosecond time-resolved transient absorption spectra of B-2 and perylene in deaerated dichlorobenzene.



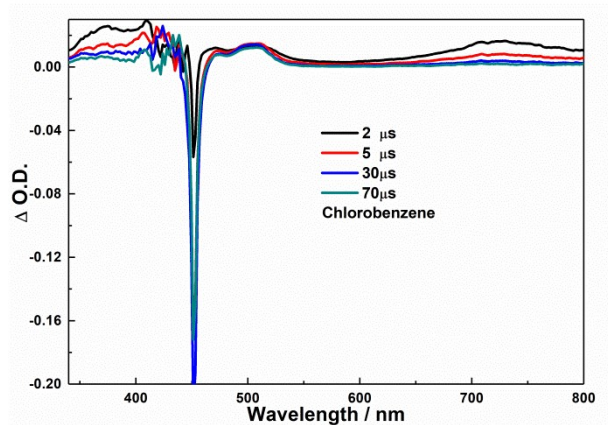

**Figure S12.** Nanosecond time-resolved transient absorption spectra of B-2 and perylene in deaerated chlorobenzene.

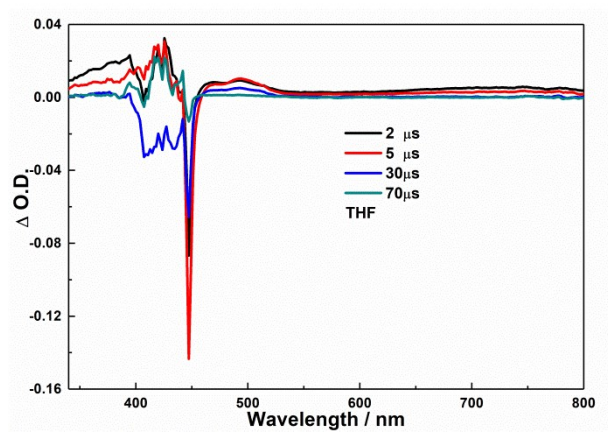

**Figure S13.** Nanosecond time-resolved transient absorption spectra of B-2 and perylene in deaerated THF.

#### 4. Decay curves of B-2 with different concentration of perylene

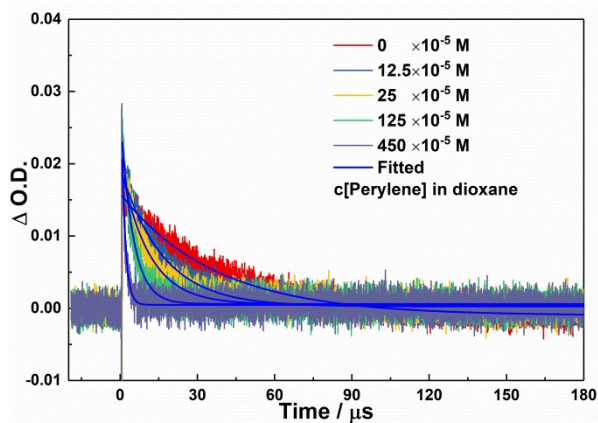

Figure S14. Decay curves of B-2 with different concentration of perylene in dioxane.

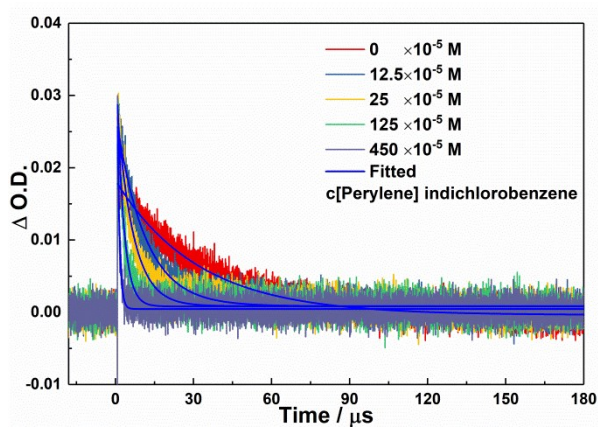

Figure S15. Decay curves of B-2 with different concentration of perylene in dichlorobenzene.

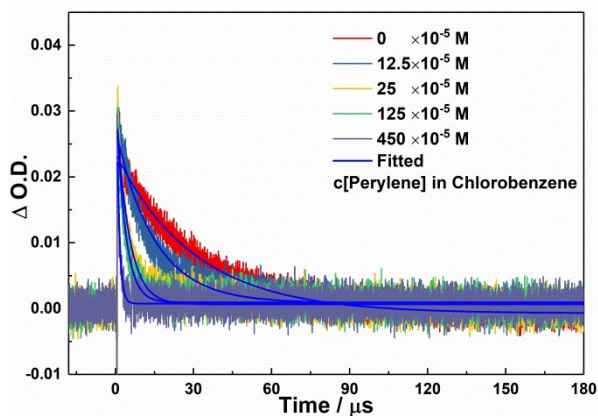

Figure S16. Decay curves of B-2 with different concentration of perylene in chlorobenzene.

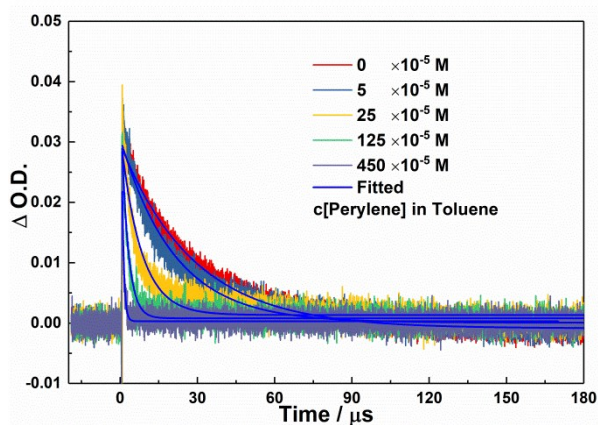

**Figure S17.** Decay curves of B-2 with different concentration of perylene in toluene.

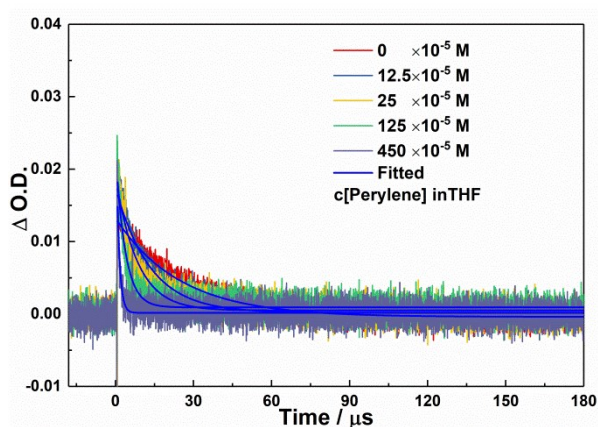

**Figure S18.** Decay curves of B-2 with different concentration of perylene in THF.

**Table S3.** Lifetime of triplet B-2 with different concentration of perylene.

| Toluene              |                    | Chlorobenzene        |                    | Dichlorobenzene      |                    | Dioxane              |                    | THF                  |                    |
|----------------------|--------------------|----------------------|--------------------|----------------------|--------------------|----------------------|--------------------|----------------------|--------------------|
| c[Pery] <sup>a</sup> | $\tau/\mu\text{s}$ |
| 0 (Air)              | 0.34               | 0 (Air)              | 0.34               | 0 (Air)              | 0.47               | 0 (Air)              | 0.44               | 0 (Air)              | 0.37               |
| 0 (Ar)               | 29.5               | 0 (Ar)               | 30.4               | 0 (Ar)               | 31.8               | 0 (Ar)               | 36.7               | 0 (Ar)               | 24.9               |
| 0.5                  | 21.1               | 1.25                 | 15.0               | 1.25                 | 16.6               | 1.25                 | 16.5               | 1.25                 | 13.2               |
| 2.5                  | 8.0                | 2.5                  | 9.2                | 2.5                  | 11.2               | 2.5                  | 11.0               | 2.5                  | 8.5                |
| 5.0                  | 3.5                | 5.0                  | 4.9                | 5.0                  | 6.3                | 5.0                  | 6.2                | 5.0                  | 5.0                |
| 12.5                 | 1.3                | 12.5                 | 1.7                | 12.5                 | 2.6                | 12.5                 | 2.4                | 12.5                 | 1.9                |
| 25                   | 0.65               | 25                   | 0.86               | 25                   | 1.4                | 25                   | 1.2                | 25                   | 0.92               |
| 45                   | 0.35               | 45                   | 0.47               | 45                   | 0.82               | 45                   | 0.70               | 45                   | 0.52               |

<sup>a</sup> The unit of perylene concentration,  $\times 10^{-4}$  M.

## 5. UV-Vis and fluorescence emission spectra of perylene and B-2

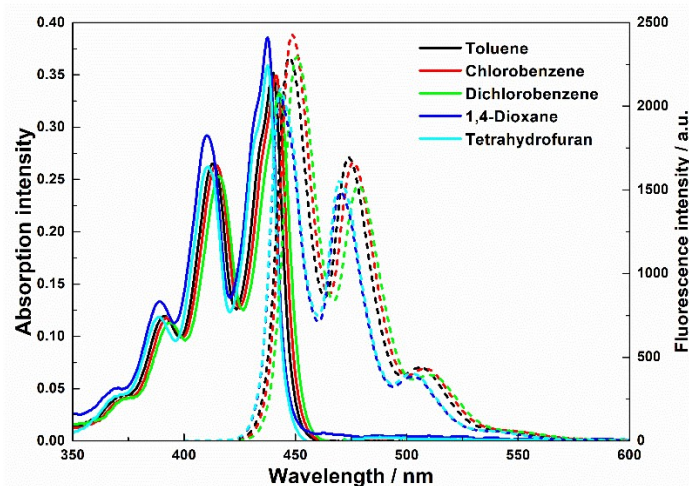

**Figure S19.** UV-Vis absorption and fluorescence emission spectra of perylene in different solvents.

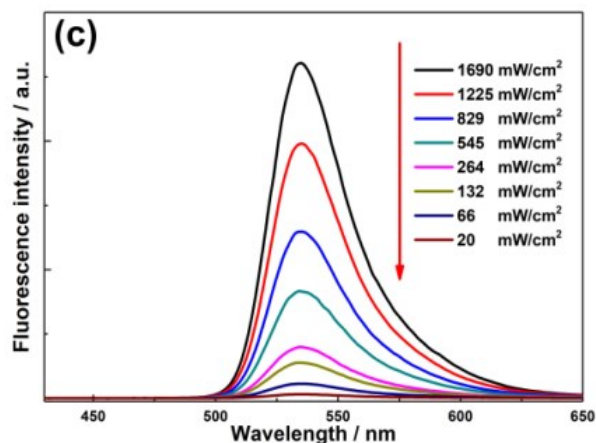

**Figure S20.** Dependence of normal fluorescence intensity of B-1 in toluene on the excitation power density at 532 nm.

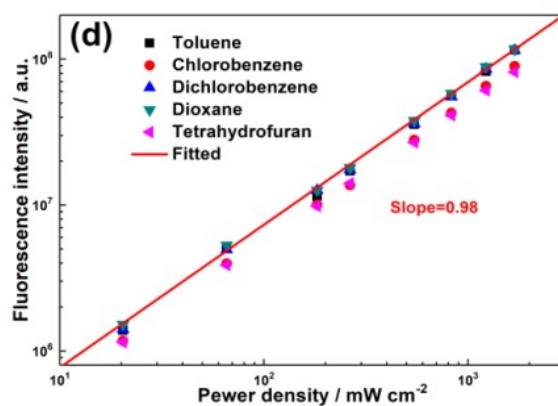

**Figure S21.** A logarithmic plot of fluorescence intensity of B-1 with excitation power density at 532 nm.

## 6. The fitted parameters of TTA upconversion.

**Table S4.** The fitted parameters,  $\beta$  and the first-order rate constants  $k_T$ , of TTA upconversion.

| Solvent         | Viscosity | Polarity | $\beta$ | $k_T (10^6 \text{ s}^{-1})$ |
|-----------------|-----------|----------|---------|-----------------------------|
| THF             | 0.55      | 4.2      | 0.878   | 0.00441                     |
| Toluene         | 0.59      | 2.4      | 0.931   | 0.00240                     |
| Chlorobenzene   | 0.8       | 2.7      | 0.890   | 0.00321                     |
| Dichlorobenzene | 1.33      | 2.7      | 0.865   | 0.00232                     |
| 1,4-Dioxane     | 1.54      | 4.8      | 0.925   | 0.00137                     |

## 7. The reported heavy-atom-free photosensitizers in TTA upconversion.

**Table S5.** The reported heavy-atom-free photosensitizers and annihilators, as well as their TTA upconversion performances.

| Sensitizer               | Acceptor | solvent                         | $\lambda_{\text{ex}}$ (nm) <sup>a</sup> | $\lambda_{\text{em}}$ (nm) <sup>b</sup> | $\Phi_{\text{UC}}$ (%) <sup>b</sup> | Ref. |
|--------------------------|----------|---------------------------------|-----------------------------------------|-----------------------------------------|-------------------------------------|------|
| C <sub>60</sub> -C-2     | perylene | toluene                         | 589                                     | 450                                     | 7.0                                 | 4    |
| 4CzTPN-Ph                | DPA      | solid                           | 532                                     | 435                                     | 0.3                                 | 5    |
| 4CzIPN                   | QP       | benzene                         | 445                                     | 355                                     | 3.9                                 | 6    |
| 4CzPN-DBP                | DBP      | toluene                         | 450                                     | 390                                     | 3.7                                 | 7    |
| compound-1               | DPA      | toluene                         | 445                                     | 435                                     | 11.3                                | 8    |
| BB-1                     | perylene | CH <sub>2</sub> Cl <sub>2</sub> | 532                                     | 450                                     | 3.7                                 | 9    |
| BDP-TEMPO-2              | perylene | toluene                         | 520                                     | 450                                     | 6.7                                 | 10   |
| 4CzPN-DBP                | DBP      | toluene                         | 450                                     | 390                                     | 1.7                                 | 11   |
| BTZ-DMAC                 | DPA      | toluene                         | 532                                     | 435                                     | 1.9                                 | 12   |
| BDP-AN-1                 | perylene | CH <sub>2</sub> Cl <sub>2</sub> | 510                                     | 450                                     | 15.8                                | 13   |
| BDP-2                    | perylene | toluene                         | 510                                     | 450                                     | 3.2                                 | 14   |
| (NDI)-C <sub>60</sub> -1 | 1CBPEA   | toluene                         | 589                                     | 500                                     | 0.5                                 | 15   |
| TTM-1Cz                  | DPA      | toluene                         | 635                                     | 435                                     | 0.3                                 | 16   |
| QDM                      | perylene | THF                             | 532                                     | 450                                     | 0.2                                 | 17   |
| Bodipy-C <sub>60</sub>   | Perylene | toluene                         | 532                                     | 450                                     | 8.0                                 | 18   |
| Bodipy-C <sub>70</sub>   | perylene | toluene                         | 532                                     | 450                                     | 10.3                                | 19   |
| DCF-MPYM                 | DPA      | THF                             | 635                                     | 428                                     | 11.2                                | 20   |

<sup>a</sup> Excitation wavelength; <sup>b</sup> Maximum of UC emission wavelength.

<sup>b</sup> The maximum upconversion quantum yield of 100%.

**Table S6.** Dynamic rates of the transient absorption band of B-2 at 700 nm in different solvents.

| Solvent        | $\epsilon$ (25°C) <sup>a</sup> | $1/\tau_1$ (s <sup>-1</sup> ) | $1/\tau_2$ (s <sup>-1</sup> ) |
|----------------|--------------------------------|-------------------------------|-------------------------------|
|                |                                | $1.61 \times 10^1$            |                               |
| 1,4-Dioxane    | 2.21                           | <sup>2</sup>                  | $1.00 \times 10^8$            |
|                |                                | $1.54 \times 10^1$            |                               |
| Toluene        | 2.24                           | <sup>2</sup>                  | $1.43 \times 10^8$            |
|                |                                | $1.18 \times 10^1$            |                               |
| Chlorobenzene  | 5.65                           | <sup>2</sup>                  | $8.13 \times 10^8$            |
| Dichlorobenzen |                                | $1.47 \times 10^1$            |                               |
| e              | 6.83                           | <sup>2</sup>                  | $7.03 \times 10^8$            |
|                |                                | $1.75 \times 10^1$            |                               |
| THF            | 7.58                           | <sup>2</sup>                  | $4.08 \times 10^8$            |

## References:

- [1] Q. Zhou, M. Zhou, Y. Wei, X. Zhou, S. Liu, S. Zhang, B. Zhang, *Phys. Chem. Chem. Phys.*, **2017**, *19*, 1516.
- [2] Olmsted, J. Calorimetric determinations of absolute fluorescence quantum yields. *J. Phys. Chem.*, **1979**, *83*, 2581.
- [3] Frisch, M. *et al.* Gaussian 09, Revision A. 02, Gaussian. Inc., Wallingford, CT **200** (2009).
- [4] W. Wu, J. Zhao, J. Sun, S. Guo, *J. Org. Chem.* **2012**, *77*, 5305.
- [5] T. C. Wu, D. N. Congreve, M. A. Baldo, *Appl. Phys. Lett.* **2015**, *107*, 031103.
- [6] N. Yanai, M. Kozue, S. Amemori, R. Kabe, C. Adachi, N. Kimizuka, *J. Mater. Chem. C* **2016**, *4*, 6447.
- [7] J. Peng, X. Guo, X. Jiang, D. Zhao, Y. Ma, *Chem. Sci.* **2016**, *7*, 1233.
- [8] D. Huang, J. Sun, L. Ma, C. Zhang, J. Zhao, *Photoch. Photobio. Sci.* **2013**, *12*, 872.
- [9] W. Wu, X. Cui and J. Zhao, *Chem. Commun.* **2013**, *49*, 9009.
- [10] Z. Wang, J. Zhao, A. Barbon, A. Toffoletti, Y. Liu, Y. An, L. Xu, A. Karatay, H. G. Yaglioglu, E. A. s. Yildiz, *J. Am. Chem. Soc.* **2017**, *139*, 7831.
- [11] Q. Chen, Y. Liu, X. Guo, J. Peng, S. Garakyaraghi, C. M. Papa, F. N. Castellano, D. Zhao, Y. Ma, *J. Phys. Chem. A* **2018**, *122*, 6673.
- [12] D. Wei, F. Ni, Z. Zhu, Y. Zou, C. Yang, *J. Mater. Chem. C* **2017**, *5*, 12674.
- [13] Z. Wang, J. Zhao, *Org. Lett.* 2017, *19*, 4492-4495.
- [14] K. Chen, W. Yang, Z. Wang, A. Iagatti, L. Bussotti, P. Foggi, W. Ji, J. Zhao, M. Di Donato, *J. Phys. Chem. A* **2017**, *121*, 7550.
- [15] S. Guo, J. Sun, L. Ma, W. You, P. Yang, J. Zhao, *Dyes Pigm.* **2013**, *96*, 449.
- [16] J. Han, Y. Jiang, A. Obolda, P. Duan, F. Li, M. Liu, *J. Phys. Chem. Lett.* **2017**, *8*, 5865.
- [17] S. Shokri, G. P. Wiederrecht, D. J. Gosztola, A. J.-L. Ayitou, *J. Phys. Chem. C* **2017**, *121*, 23377.
- [18] Y. Wei, M. Zhou, Q. Zhou, X. Zhou, S. Liu, S. Zhang, B. Zhang, *Phys. Chem. Chem. Phys.* **2017**, *19*, 22049.
- [19] Y. Wei, M. Zheng, Q. Zhou, X. Zhou, S. Liu, *Org. Biomol. Chem.* **2018**, *16*, 5598.
- [20] W. Chen, F. Song, S. Tang, G. Hong, Y. Wu, X. Peng, *Chem. Commun.* **2019**, *55*, 4375.
